# Supplementary material
Source: PubMed Central journal article supplement (PMC3507496)
Supplement: cc-11-4009-s01.pdf [file cc-11-4009-s01.pdf]

## **Supplemental Material to:**

**Rosanna Lau, Min Ying Niu and M.A. Christine Pratt**

**cIAP2 represses IKK $\alpha$ / $\beta$ -mediated activation of MDM2 to  
prevent p53 degradation**

**Cell Cycle 2012; 11(21)**

**<http://dx.doi.org/10.4161/cc.22223>**

**<http://www.landesbioscience.com/journals/cc/article/22223>**

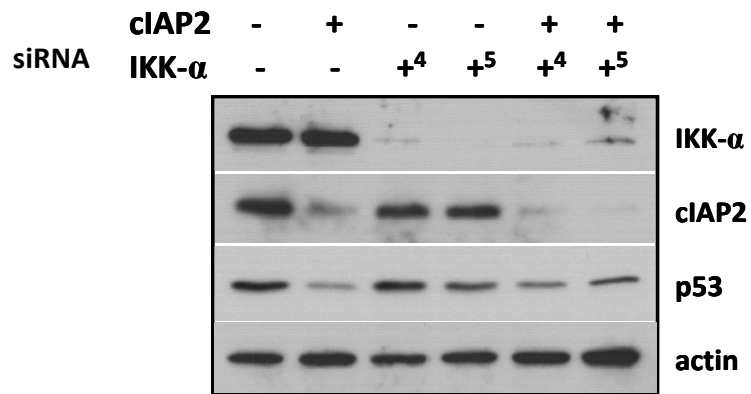

Figure S1. Additional IKK- $\alpha$  siRNA sequences partially rescue p53 after cIAP2 knockdown. MCF-10AT1 cells were transfected with two additional siRNAs duplexes targeted at IKK- $\alpha$  (labeled as 4 and 5) in the presence or absence of cIAP2 siRNA. Cells were harvested after 48 hours and protein extracts were immunoblotted for IKK $\alpha$ , cIAP2 and p53.
